# Supplementary material for: Effects of bench press technique variations on musculoskeletal shoulder loads and potential injury risk
Source: Frontiers journal article supplement (doi:10.3389/fphys.2024.1393235), 2024-06-21
Supplement: Data_Sheet_1.PDF [file Data_Sheet_1.PDF]

# Supplementary Material

## 1 TABLES

**Table S1.** Anatomical locations of experimental markers per body segment.

| Segment   | Anatomical location                                                                                                                                                                                                           |
|-----------|-------------------------------------------------------------------------------------------------------------------------------------------------------------------------------------------------------------------------------|
| Thorax    | Incisura Jugularis<br>Processus Xiphoideus<br>Cervical Vertebrae 7<br>Thoracic Vertebrae 6<br>Thoracic Vertebrae 6                                                                                                            |
| Scapula   | Acromion-cluster marker (3 markers)<br>to track the translation and orientation<br>of the pointered scapula landmarks below.<br>Trigonum Spinae (pointered)<br>Angulus Acromialis (pointered)<br>Angulus Inferior (pointered) |
| Humerus   | Epicondylus Medialis<br>Epicondylus Lateralis                                                                                                                                                                                 |
| Lower Arm | Ulnar Styloid<br>Radial Styloid                                                                                                                                                                                               |
| Hand      | 2nd Metacarpal Head (MH2)<br>5th Metacarpal Head (MH5)                                                                                                                                                                        |

**Table S2.** All bench press techniques with different combinations of scapula poses, shoulder abduction angles, and grip widths.

| Technique code | Scapula pose | Shoulder abduction angle [°] | Grip width (in bi-acromial widths) |
|----------------|--------------|------------------------------|------------------------------------|
| 1              | Neutral      | 45                           | 1                                  |
| 2              | Neutral      | 45                           | 1.5                                |
| 3              | Neutral      | 70                           | 1                                  |
| 4              | Neutral      | 70                           | 1.5                                |
| 5              | Neutral      | 70                           | 2                                  |
| 6              | Neutral      | 90                           | 1.5                                |
| 7              | Neutral      | 90                           | 2                                  |
| 8              | Retracted    | 45                           | 1                                  |
| 9              | Retracted    | 45                           | 1.5                                |
| 10             | Retracted    | 70                           | 1                                  |
| 11             | Retracted    | 70                           | 1.5                                |
| 12             | Retracted    | 70                           | 2                                  |
| 13             | Retracted    | 90                           | 1.5                                |
| 14             | Retracted    | 90                           | 2                                  |
| 15             | Released     | 45                           | 1                                  |
| 16             | Released     | 45                           | 1.5                                |
| 17             | Released     | 70                           | 1                                  |
| 18             | Released     | 70                           | 1.5                                |
| 19             | Released     | 70                           | 2                                  |
| 20             | Released     | 90                           | 1.5                                |
| 21             | Released     | 90                           | 2                                  |

**Table S3.** Mean horizontal barbell forces for all participants expressed in Newton and as percentage of the vertical force. Positive values/variations indicate lateral forces, negative values/variation indicate medial forces.

|     | Mean horizontal force [N] | Mean horizontal force [% vertical force] |
|-----|---------------------------|------------------------------------------|
| P1  | 71.8                      | 91.5                                     |
| P2  | -49.0                     | -62.4                                    |
| P3  | 64.7                      | 82.4                                     |
| P4  | 20.1                      | 25.6                                     |
| P5  | 3.2                       | 4.1                                      |
| P6  | 90.9                      | 115.8                                    |
| P7  | 11.2                      | 14.3                                     |
| P8  | -15.2                     | -19.4                                    |
| P9  | 17.1                      | 21.8                                     |
| P10 | -34.4                     | -43.8                                    |

## 2 FIGURES

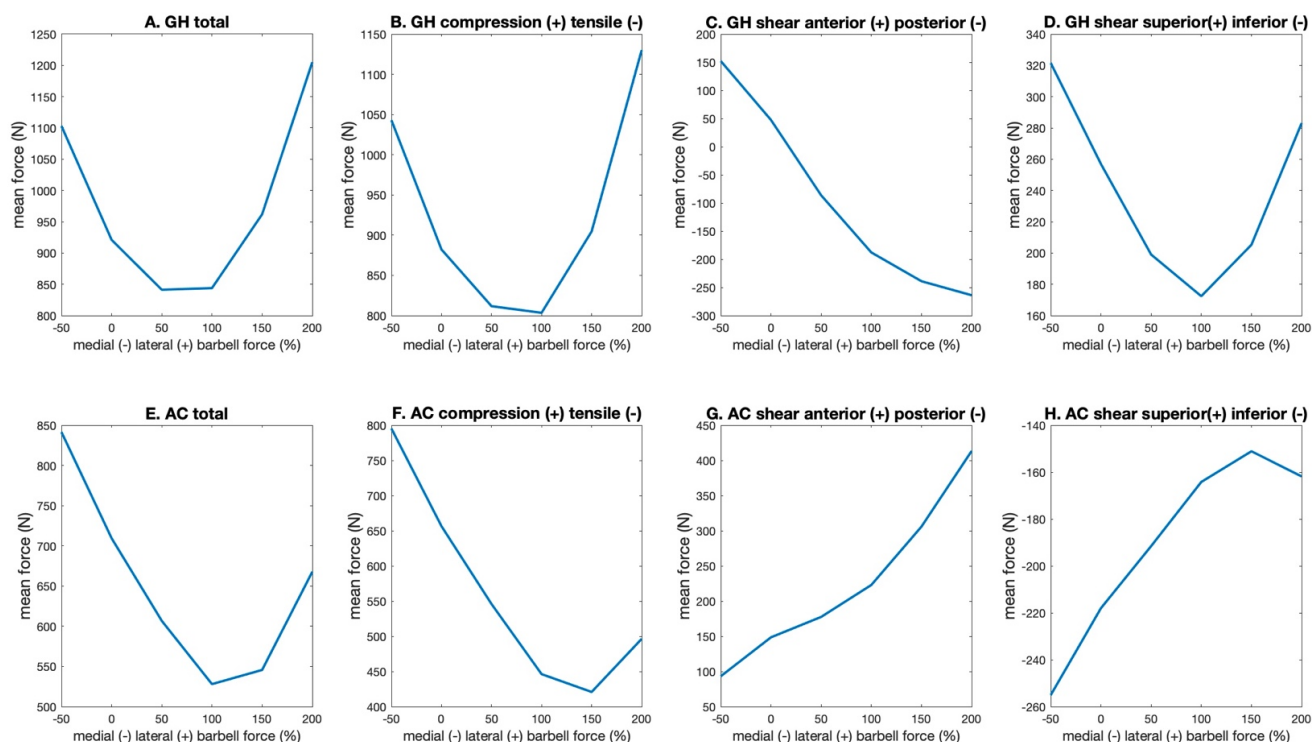

**Figure S1.** Mean reaction forces in the glenohumeral and acromioclavicular joints for simulated mediolateral barbell forces during one example bench press trial. Mean joint reaction forces were first calculated from the timeseries of each repetition and subsequently averaged over the multiple repetitions. Simulated mediolateral forces are expressed as percentage of the vertical force.
